# Supplementary material
Source: HighWire-hosted journal article supplement (https://clinchem.aaccjnls.org/content/suppl/2010/04/14/clinchem.2009.141523)
Supplement: Cxd_Mar10_Sci_Writing_Esp.pdf [file Cxd_Mar10_Sci_Writing_Esp.pdf]

---

## El Título lo dice todo

por Thomas M. Annesley

---

La elaboración de un buen título es como el plegado de una línea recta a un círculo conectado sin problemas. Permítanme explicar. Los títulos son lo primero que ven los lectores, sin embargo, a menudo son la parte final de un manuscrito, y con la misma frecuencia, se les da la menor atención. Guías sobre cómo escribir artículos científicos recomiendan empezar con la sección de Métodos, seguido por Resultados, Discusión, Introducción, Resumen, y el Título. Hay un cierto grado de lógica en este orden lineal ya que los autores tienen notas detalladas y la documentación sobre los métodos utilizados, los resultados obtenidos, y la interpretación de los resultados cuando empiezan a escribir un artículo. El título, sin embargo, es el componente que cierra el círculo. El título se basa en las otras secciones del documento y se convierte en la cara del papel - el descriptor, el anuncio, el campo. Al igual que un cartel, es la oportunidad de 10 segundos de contactar con el transeúnte (lector). Así que es importante para hacer el recuento de título. Aquí ofrezco algunos consejos y ejemplos para ayudarle a alcanzar este objetivo.

### Ser Conciso

Cuando preguntan “¿Qué tan largo debe de ser el título?” mi respuesta es que la duración debe de ser la justa. No es para evitar la pregunta, sino para contestarle al autor que el título debe equilibrar el número de palabras necesarias para describir el contenido del documento para evitar la pérdida o confusión del lector con demasiadas palabras. Como se ve un título puede significar tanto como lo que dice. En la mayoría de los casos, los títulos terminan siendo mejores si se quitan palabras en vez de ser añadidas. Evitar el desperdicio utilizando palabras como “un estudio de”, “la investigación de”, “desarrollo de”, u “observaciones en”. Los lectores comprenden que usted no estaría escribiendo el documento a menos que usted haya estudiado, investigado, observado o desarrollado algo. Del mismo modo, evitar la inclusión de adjetivos tales como “nuevo”, “mejorado”, “novela”, “validada”, y “sensibles”. ¿Por qué una revista desearía considerar un estudio que no sea nuevo, no esté validado, o no fuera sensible? Muchas revistas tienen límites estrictos sobre el número de palabras o caracteres que se pueden incluir en el título, por lo que siempre ayuda buscar palabras que se pueden eliminar de un título sin afectar la claridad o el mensaje.

### Ser Claro

Considerar los siguientes títulos:

- Detección de virus H1N1 en ratones utilizando la reacción en cadena de la polimerasa
- Sangre de donantes de médula ósea almacenada en los escudos de hielo con los porcentajes más altos de HLA-emparejada
- Tratamiento de pacientes pediátricos de melanoma con laser
- Valor de la cuantificación esfingomielina de líquido amniótico de los fetos con mutaciones en el gen G1- $\alpha$  de significado incierto

Esos ratones son extraordinarios en el primer documento si son capaces de realizar análisis de la cadena de reacción de la polimerasa. He donado sangre en los últimos discos de la médula ósea, pero estoy pensando en abandonarlo en el futuro si los organismos se van a almacenarme en el hielo sólo para que puedan obtener un mejor resultado. Si yo fuera un pediatra me gustaría pedir que alguien desarmara a los láseres para esos niños antes de que yo entrara en la sala de tratamiento. Por último, ¿es de significado incierto el valor de esfingomielina del líquido amniótico, o las mutaciones del gen de significado incierto? Es probable que los lectores se den cuenta del verdadero significado de un título incierto, pero su mentalidad posterior al leer el resto del documento (si es que no termina aquí) podría verse afectado negativamente. Ahora considere alternativas a los títulos anteriores:

- Prueba de reacción en cadena de la polimerasa para el virus H1N1 en ratones
- Porcentajes mayores de HLA-emparejada para sangre almacenada en hielo
- Tratamiento en laser para pacientes pediátricos con melanoma
- Cuantificación de esfingomielina del líquido amniótico identifica en el gen G1- $\alpha$  mutaciones de significado incierto

Estos hipotéticos ejemplos de títulos raros y sus modificaciones demuestra que la sintaxis (orden de las palabras) en un título merece mayor atención de la que recibe. Solo debe de haber un significado para su título. Una buena práctica es mostrar el título a los colegas que no son coautores y pedirles que le digan qué mensaje reciben de sus palabras.

**Tabla 1. La eficacia variable de los títulos en el suministro de información.**

|                                                                                                                      |
|----------------------------------------------------------------------------------------------------------------------|
| • Un nuevo método para sirolimus                                                                                     |
| • Análisis de sirolimus mediante la cromatografía líquida de alto rendimiento-espectrometría de masa.                |
| • Análisis rápido de la sangre completa mediante la cromatografía líquida de alto rendimiento-espectrometría de masa |
| • Estatinas y colesterol                                                                                             |
| • Efecto de las estatinas en el colesterol sérico.                                                                   |
| • Reducción de colesterol sérico con terapia de estatina                                                             |
| • Terapia de estatina reduce el colesterol sérico en pacientes con enfermedades cardiovasculares                     |
| • Prueba animal para virus de gripe                                                                                  |
| • Prueba animal para el virus H1N1                                                                                   |
| • Prueba a perros para el virus H1N1                                                                                 |
| • Prueba de reacción en cadena de la polimerasa en perros para el virus H1N1                                         |

### Ser Informativo

A pesar de que los títulos concisos se consideran una virtud, a veces los títulos son tan cortos e incompletos que le dicen muy poco al lector sobre el tema del artículo. La tabla 1 muestra las variaciones en tres títulos, que van de menos a más informativo. En el primer ejemplo, el título más informativo incluye la ventaja específica del método (rápido), la muestra utilizada (sangre entera), el compuesto analizado (sirolimus), y el método utilizado (cromatografía líquida de alto rendimiento-espectrometría de masa). Esta descripción completa del tema del documento usando 13 palabras (99 caracteres). El segundo ejemplo se inicia con una declaración general de que el documento es sobre las estatinas y el colesterol, dando al lector poca información. Hay más información cuando el lector se entera de que las estatinas afectan al colesterol, pero la información es mayor cuando los lectores aprenden que las estatinas redujeron el colesterol. El título más informativo dice a los lectores la variable independiente (terapia con estatinas), la variable dependiente (colesterol), el efecto observado (reducción), y la población de pacientes estudiados (enfermedades cardiovasculares) usando solo 10 palabras (80 caracteres). En las revistas biomédicas se asume típicamente que las especies estudiadas son los seres humanos a menos de que se especifique lo contrario. En todos los estudios (por ejemplo, animales, bacterias, cultivos celulares) el título debe indicar claramente el organismo o sistema biológico estudiado (por ejemplo, los perros, E. Coli, las células HeLa), como se muestra en el tercer ejemplo en la Tabla 1.

### Usa sabiamente palabras claves y términos

Las palabras clave y términos desempeñan un papel importante y deben elegirse cuidadosamente. Dado que muchos lectores primero consultan su documento mediante la exploración a través de una tabla de contenidos, como autor uno desea capturar la atención del lector con las palabras y términos que ponen de relieve el contenido (o mensaje) del documento. Las palabras clave o términos que se utilizan en un título, también debe ser la misma que se usa en todo el texto. Use los títulos de las tablas 1 y 2 como ejemplo, si utiliza antígeno leucocitario humano (HLA) coincide en el título, no sustituya otros términos en el texto del resumen o como coincidencia principal de histocompatibilidad o complejo mayor de histocompatibilidad (MHC) de coincidencia. Si utiliza la cromatografía líquida de alto rendimiento en el título, no cambie a ensayo cromatográfico en diversos puntos en el documento. Palabras y expresiones clave en el título son también importantes porque son los mismos términos que los servicios de indización (por ejemplo, PubMed) y los motores de búsqueda (por ejemplo, Google) en clave. Una vez más, evitar el uso de términos genéricos como animal, bacteria, o antibiótico como sus palabras clave, cada uno de ellos puede tener varios significados. Un lector potencial que busca información sobre la intoxicación por salmonella no puede iniciar con las bacterias como un término de búsqueda, ya que encontrará más de un millón de artículos en PubMed. Su documento se pierde como una gota de agua en el océano de papeles. Los motores de búsqueda como Google suele mostrar sólo las primeras 6-7 palabras de un título, por lo que es un beneficio colocar los términos que más le interesa asociar con su documento al principio del título (Tabla 2). Esta es también otra razón para eliminar frases innecesarias como “el desarrollo y validación de un sensible”, que está usando ya las 6 primeras palabras.

### Conozca la revista y la audiencia a la que se dirige

Un error común de los autores es la falla al leer las instrucciones explícitas el formato de resumen, el estilo, los límites de palabras, etc, requeridos por una determinada revista. A pesar del acceso a esta información, con frecuencia los autores presentan documentos con los títulos que no cumplen con los requisitos de la revista. Algunas revistas tienen un límite en el número de palabras o caracteres en un título, o puede solicitar que los títulos se escriban como frases, no oraciones (por ejemplo, “Reducción del colesterol con el tratamiento con estatinas” contra “Las concentraciones de colesterol se reducen con el tratamiento con estatinas”). Otras revistas prohíben subtítulos o la designación de los documentos como parte 1 y parte 2. Un buen consejo es leer los números anteriores de la revista de interés para ver los títulos que han sido pu-

**Tabla 2. Cambio de énfasis a través de la reorganización de los títulos.**

|                                                                                                                                                |
|------------------------------------------------------------------------------------------------------------------------------------------------|
| Cuantificación de esfingomielina del líquido amniótico puede identificar mutaciones en el gen G1- $\alpha$ de significado incierto             |
| Énfasis: <i>Líquido amniótico, esfingomielina</i>                                                                                              |
| Mutaciones en el gen G1- $\alpha$ de significado incierto puede ser identificado por la cuantificación de esfingomielina del líquido amniótico |
| Énfasis: <i>mutaciones en el gen G1-<math>\alpha</math></i>                                                                                    |
| Sangre almacenada en los escudos de hielo con altos porcentajes de HLA-emparejada para donantes de médula ósea                                 |
| Énfasis: <i>Procesamiento de la sangre y almacenaje</i>                                                                                        |
| Altos porcentajes de HLA-emparejada en donante de médula ósea para sangre almacenada en hielo                                                  |
| Énfasis: <i>Médula ósea HLA emparejada</i>                                                                                                     |
| Primer trimestre de embarazo materno asociado a la proteína plásmica A es influenciado por fumar                                               |
| Énfasis: <i>Primer trimestre Proyección materna</i>                                                                                            |
| Fumar influye en el primer trimestre de embarazo materno asociado con la proteína plásmica A                                                   |
| Énfasis: <i>Efecto de fumar</i>                                                                                                                |
| Pruebas de habilidad para mancha de tripsina en sangre seca para proyección del recién nacido para fibrosis quística                           |
| Énfasis: <i>Pruebas de competencia, sangre seca</i>                                                                                            |
| Proyección del recién nacido por fibrosis quística: pruebas de habilidad para mancha de tripsina en sangre seca                                |
| Énfasis: <i>Proyección del recién nacido, fibrosis quística</i>                                                                                |

blicados. El orden en que las palabras y los términos se utilizan en un título también puede influir en interés de los lectores en su documento. Por lo tanto, es importante decidir lo que se quiere enfatizar en el tema principal. El cuadro 2 contiene cuatro pares de títulos, en la que la primera mitad del título de cada pareja enfatiza un tema diferente. La hipótesis del estudio y los resultados son los mismos, pero de los cuatro documentos en la tabla se verá en una luz diferente y atrayendo a distintos públicos en función de cómo se organizan las palabras en el título.

### Evitar Abreviaturas

Las abreviaturas pueden causar problemas severos y deberían de evitarse en un título. Primero, las abreviaturas confunden y pierden a los lectores si no son expertos en la materia de su documento. Segundo, a menos que la abreviatura en el título sea una abreviación estándar aceptada usada para indexar servicios, su documento podría no ser indizado correctamente y podría ser olvidada por lectores potenciales. Tercero, incluso si es una abreviatura estándar, indexar servicios generalmente provee a los lectores con acceso solo a títulos y resúmenes, no al texto principal del documento, cuando las abreviaturas están definidas. En raras ocasiones las abreviaturas para algunos nombres se ha convertido en algo que se usa más ampliamente que

las iniciales que se utilizan en el lenguaje común. Por ejemplo, la persona promedio no dice que su familia tiene longevidad por su buen ácido desoxirribonucleico. En su lugar dicen "ADN". Términos comunes similares incluyen ARN, AIDS, CDC, y FDA. En estas circunstancias, usar la abreviatura en lugar del nombre completo puede ser más claro para el lector. Cuando es una pregunta, de cualquier modo, checar con la revista en específico o buscar materiales de referencia o guías de estilo.

### Ejercicio de Aprendizaje

Sabiendo de su importancia, usted debería estar dispuesto a escribir títulos claros, concisos e informativos. Los primeros tres títulos enlistados abajo pueden ser los mejores de todos. Trate de reescribirlos usando los consejos y advertencias discutidas en este artículo. Para el cuarto título, trate de crear un título resumido. Algunos nuevos títulos posibles son dados en una caja después de la lista seleccionada de materiales de lectura adicionales.

- Desarrollo y evaluación para un nuevo ELISA para la detección mejorada de anticuerpos anti-nucleares de Lupus-específico.
- Un método válido para la cuantificación sensible de sirolimus en la sangre entera mediante el uso de extracción en línea conectada a la cromatografía líquida-espectrometría de masa.
- Evaluación de moléculas de siRNA revela que son sensibles y específicos biomarcadores de sepsis.
- Reducción de las cargas virales en la sangre después del tratamiento albinovir de pacientes infectados con VIH.

### Sumario

Hay un viejo dicho, "No obtienes una segunda oportunidad para causar la primera impresión." El título de este documento tiene el poder de influenciar la primera impresión de su trabajo como lector, revisor, o editor. Las palabras seccionadas para incluirse en un título describiendo el contenido de su documento debe de ser claro, conciso, informativo y relevante al público al que se dirige. Examine la tabla de contenidos para varias revistas importantes y decida la redacción y estilo de títulos que capturarán su atención. Pronto ganará un aprecio especial por la importancia del título cuando escriba su próximo documento a publicar.

### Lectura Adicional

- Day RA, Gastel B. How to write and publish a scientific paper. Westport CT: Greenwood Press, 2006.
- Zeiger M. Essentials of writing biomedical research papers. New York NY: McGraw Hill, 2000.

---

## Respuestas para el Ejercicio de Aprendizaje

Desarrollo y evaluación para un nuevo ELISA para la detección mejorada de anticuerpos anti-nucleares de Lupus-específico

Título Revisado

ELISA con detección mejorada de anticuerpos anti-nucleares con lupus-específico

Un método válido para la cuantificación sensible de sirolimus en la sangre entera mediante el uso de extracción en línea conectada a la cromatografía líquida-espectrometría de masa.

Título Revisado

Cuantificación de sirolimus en la sangre entera mediante el uso de extracción en línea cromatografía líquida-espectrometría de masa

Evaluación de moléculas siRNA revela ser sensibles y específicos biomarcadores de Sepsis

Título Revisado

El Plasma de siRNA es Biomarcador de Sepsis

Reducción de las cargas virales en la sangre después del tratamiento albinovir de pacientes infectados con VIH

Título Resumido

Reducción de carga viral de VIH con tratamiento albinovir (49 caracteres)

Tratamiento albinovir y carga viral de VIH (38 caracteres)

tratamiento VIH con albinovir (28 caracteres)
